# Supplementary material
Source: PubMed Central journal article supplement (PMC8331161)
Supplement: kiab207_supplementary_data.pdf [file kiab207_supplementary_data.pdf]

1 **Supplemental Data**

2 Ibrahim Bourbia, Carola Pritzkow and Timothy J. Brodribb

3 School of Natural Sciences, University of Tasmania, Private Bag 55, Hobart, Tas. 7001,  
4 Australia

5

6 Author for correspondence:

10 *Timothy J. Brodribb*

11 *Tel: +61 (0)3 6226 1707*

12 *Email: timothy.brodribb@utas.edu.au*

13

14

15

16

17

18

19

20

21

22

23

24

25

26

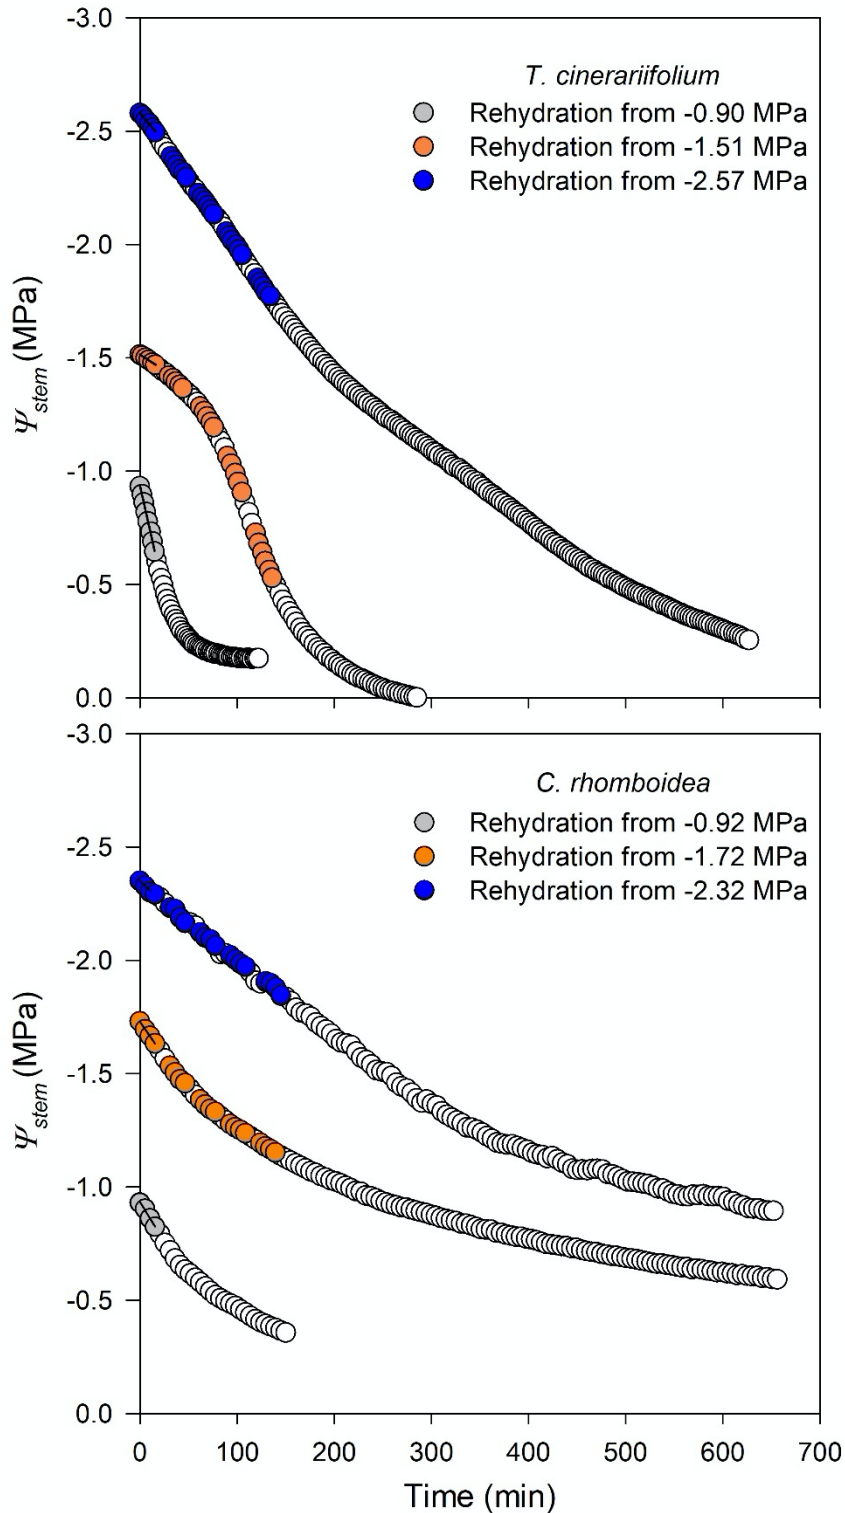

28 **Supplemental Figure S1.** Stem water potential  $\Psi_{stem}$  relaxation kinetics (open circles)  
 29 predicted using petiole width displacement recorded by optical dendrometers while  
 30 rehydrating plants through the soil at different water stress levels. Exponential regressions  
 31 (solid lines) were fitted to the first 15 min of stem water potential relaxation data at  
 32 rehydration (coloured circles) and used to calculate the initial  $Kr$  at different water stress  
 33 levels. The trajectory of  $Kr$  recovery from  $\Psi_{soil} \sim -1.5$  MPa (orange circles) and  $\Psi_{soil} \sim -2.5$

34 MPa (blue circles) was calculated the same way by fitting an exponential regression to 15  
35 min of  $\Psi_{stem}$  relaxation data every 30 min over the first 120 min of rehydration.

36

37

38

39

40

41

42

43

44

45

46

47

48

49

50

51

52

53

54

55

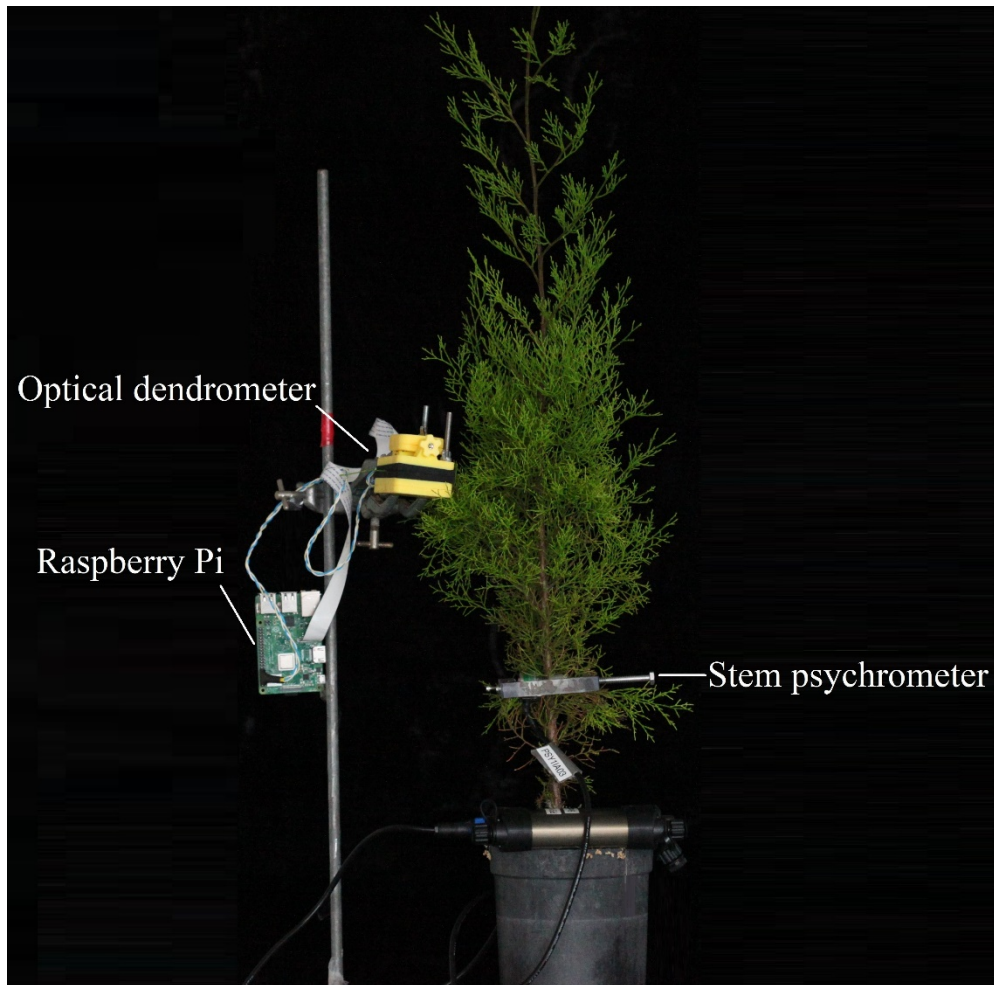

56 **Supplemental Figure S2.** The set-up for root hydraulic conductance measurements in the  
57 woody *C. rhomboidea*. Branchlet width changes during drying and rehydration are  
58 continuously monitored with an optical dendrometer connected to a Raspberry Pi  
59 microcomputer. Stem water potential is measured with a stem psychrometer attached to the  
60 stem at the base of the plant.

61

62

63

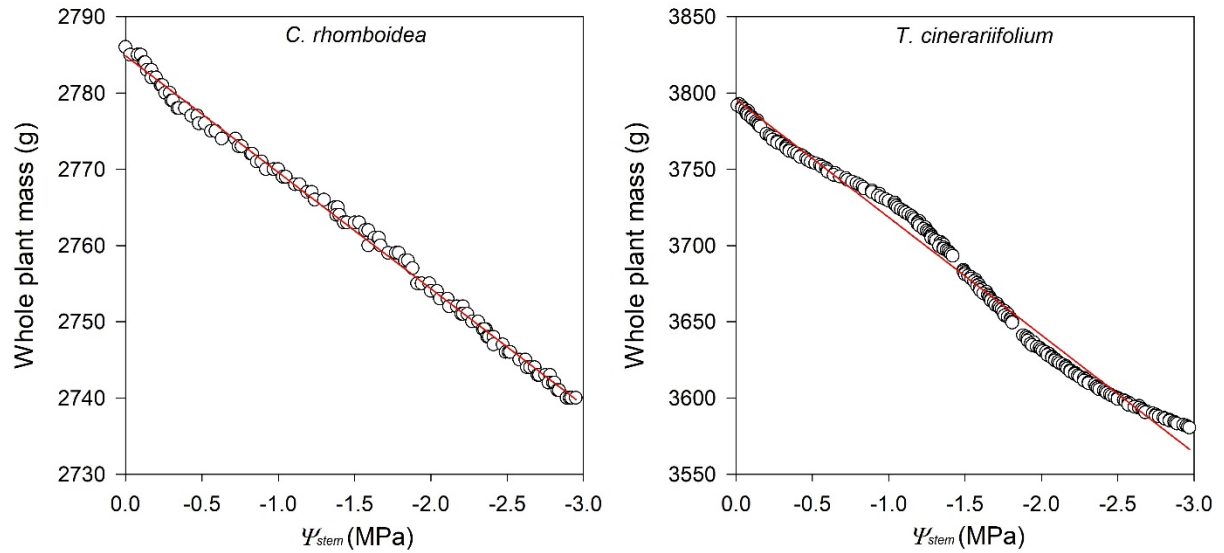

64  
65  
66  
67  
68  
69  
70  
71  
72  
73  
74  
75  
76  
77  
78  
79  
80  
81  
82  
83  
84  
85  
86  
87

**Supplemental Figure S3.** Simultaneous measurements of whole plant mass and stem water potential  $\Psi_{stem}$  (open circles) in individual plants of the woody *C. rhomboidea* and the herbaceous *T. cinerariifolium*. Whole plant capacitance  $C_{plant}$  ( $\text{mmol m}^{-2} \text{MPa}^{-1}$ ) was determined from the slope of the linear relationship (red solid lines) between whole plant mass and  $\Psi_{stem}$  (between 0 and -3 MPa) and normalized by total plant projected leaf area ( $\text{m}^2$ ).

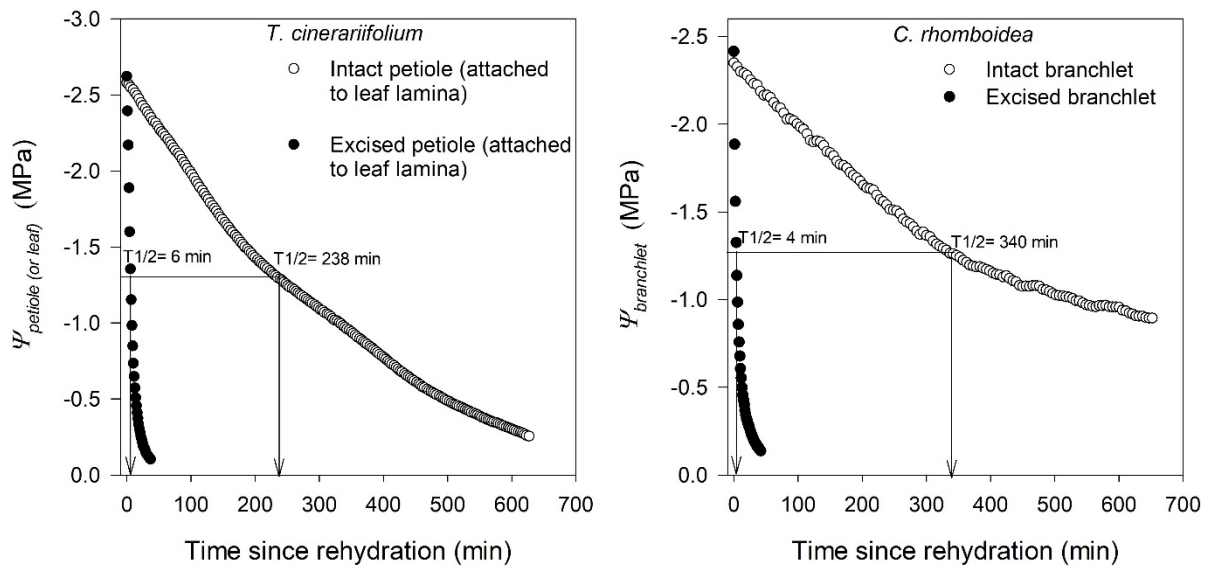

88  
89  
90  
91  
92  
93  
94  
95  
96  
97  
98  
99  
100  
101  
102  
103  
104  
105  
106  
107  
108

**Supplemental Figure S4.** Rehydration kinetics of excised and intact petioles (attached to their leaf laminas) and branchlets in the herbaceous *T. cinerariifolium* and the woody *C. rhomboidea*. Water potential of both intact and excised petioles/branchlets ( $\Psi_{\text{petiole (or leaf)}}$  and  $\Psi_{\text{branchlet}}$ , respectively) was predicted using petiole and branchlet width displacement recorded by optical dendrometers that were securely attached to these tissues while rehydrating. Rehydration of excised petioles (attached to their leaf laminas) and branchlets (with dendrometers) was done by detaching them under filtered/degassed water from plants when reached moderate ( $\sim -2.5$  MPa). For both intact and excised petioles/branchlets, the initial and final  $\Psi$  following rehydration were measured with a pressure chamber to validate the predicted  $\Psi$ . The initial  $\Psi$  of excised petioles/branchlets was measured using a neighbouring leaf/branchlet while the final  $\Psi$  was determined on the captured detached ones themselves after removing them from the dendrometers. Rehydration from  $\sim -2.5$  MPa was much faster in excised than in intact petioles and branchlets. The half time ( $T_{1/2}$ ) of relaxation was 6 min in excised compared with 238 min in intact petioles of the herbaceous *T. cinerariifolium* and 4 min in excised compared with 340 min in intact branchlets of the woody *C. rhomboidea*

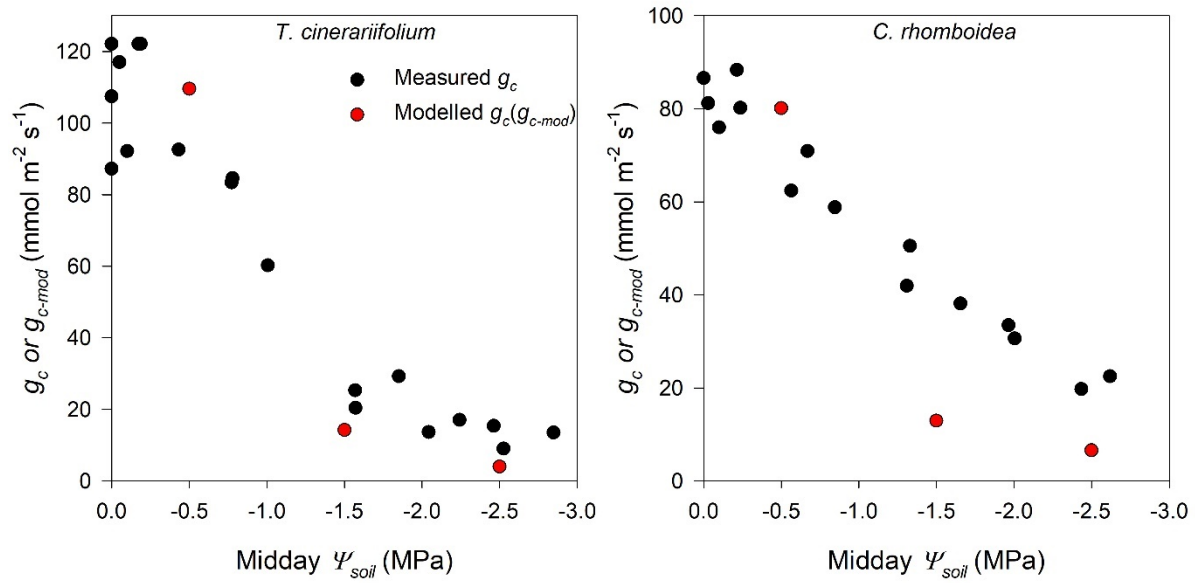

109  
110  
111  
112  
113

**Supplemental Figure S5.** Measured (black circles) and modelled (red circles) canopy conductance using observed root hydraulic conductance ( $Kr$ ) during increasing soil water stress in the herbaceous *T. cinerariifolium* and the woody *C. rhomboidea*.
